# Supplementary material
Source: MDPI journal article supplement (https://www.mdpi.com/2073-4441/15/1/18)
Supplement: s1 [file s1]

## SUPPLEMENTARY

for the manuscript entitled as

### “HYDROCLIMATE IMPACT ANALYSES AND WATER MANAGEMENT IN CENTRAL RIFT VALLEY BASIN IN ETHIOPIA”

**Lemma Adane Truneh<sup>a\*</sup>, Svatopluk Matula<sup>a</sup> and Kamila Báb'ková<sup>a</sup>**

<sup>a</sup> Department of Water Resources, Faculty of Agrobiological Sciences, Czech University of Life Sciences Prague; Czech Republic.

\*Correspondence: Lemma Adane Truneh. Address: Kamýčká 129, Suchbátka, 16500 Praha. Email: truneh@af.czu.cz

The supplementary files are detailed and additional tables and figures to enrich the manuscript submitted. **N.B.** These files need to be read in line with the manuscript.

#### Supplementary Tables

Table S1. Some physical properties of major soils in the CRV sub-basins.

| SWAT Soil Names | Area in CRVB (ha) | (%) in CRVB | (%) in Ketar | (%) in Meki | (%) in Shalla | Texture    | Hydrology group | No. of layers |
|-----------------|-------------------|-------------|--------------|-------------|---------------|------------|-----------------|---------------|
| FLUVISOLS       | 55600.20          | 3.63        | 0.65         | 1.37        | 0.0           | Loam       | B               | 3             |
| EUVERTISOLS     | 547949.29         | 35.81       | 33.04        | 22.97       | 14.3          | Clay       | D               | 3             |
| LEPTOSOLS       | 512179.96         | 33.47       | 1.55         | 3.77        | 4.7           | Loamy sand | B               | 2             |
| LTLEPTOSOLS     | 293937.73         | 19.21       | 53.60        | 16.21       | 15.1          | Sandy loam | A               | 1             |
| WATER           | 120529.15         | 7.88        | NA           | NA          | NA            | Water      | D               | 1             |

Note: The digitalized soil shape file data was obtained from Ministry of Agriculture and Natural Resources

Table S2. Location of meteorological stations used for the analysis of the weather parameters in the CRVB.

| No. | Station name | Latitude | Longitude | Elevation | Ownership |
|-----|--------------|----------|-----------|-----------|-----------|
| 1   | Arsi-Nagelle | 7.35°N   | 38.68°E   | 1800      | NMA       |
| 2   | Assella      | 7.97°N   | 39.08°E   | 2413      | NMA       |
| 3   | Awassa       | 7.06°N   | 38.48°E   | 1694      | NMA       |
| 4   | Butajira     | 8.11°N   | 38.38°E   | 2131      | NMA       |
| 5   | Shashemane   | 7.2°N    | 38.61°E   | 1927      | NMA       |
| 6   | Ziway        | 7.93°N   | 38.7°E    | 1640      | NMA       |

Table S3. SWAT land use code and their description

| Object ID | LANDUSE | Land use descriptions |
|-----------|---------|-----------------------|
|-----------|---------|-----------------------|

---

|    |      |                                                                          |
|----|------|--------------------------------------------------------------------------|
| 1  | AGRR | Cultivated Land; Rainfed; Cereal Land Cover System; lightly stocked      |
| 2  | RNGB | Shrubland; Open (20-50% woody cover)                                     |
| 3  | RNGE | Grassland; lightly stocked                                               |
| 4  | RNGE | Grassland; unstocked (woody plant)                                       |
| 5  | AGRR | Cultivated Land; Rainfed; Cereal Land Cover System; moderately stocked   |
| 6  | AGRR | Cultivated Land; Rainfed; Cereal Land Cover System; unstocked (woody pl) |
| 7  | RNGE | Grassland; moderately stocked                                            |
| 8  | WATR | Wetland; Open water                                                      |
| 9  | RNGB | Shrubland; Dense (>50% woody cover)                                      |
| 10 | BARR | Bare land; Exposed sand / soil                                           |
| 11 | BARR | Bare land; Exposed rock                                                  |
| 12 | RNGE | Woodland; Dense (>50% tree cover)                                        |
| 13 | FRSE | Forest; Montane coniferous; Open (20-50% crown cover)                    |
| 14 | RNGE | Woodland; Open (20-50% tree cover)                                       |
| 15 | ORCD | Forest; Plantation Forest; Open (20-50% crown cover)                     |
| 16 | AGRL | Cultivated Land; Shifting cultivation; lightly stocked                   |
| 17 | AGRL | Cultivated Land; Shifting cultivation; moderately stocked                |
| 18 | FRSE | Forest; Riparian; Open (20-50% crown cover)                              |
| 20 | URMD | Urban                                                                    |
| 21 | WETN | Wetland; Seasonal Swamp / Marsh                                          |
| 22 | AGRC | Cultivated Land; Irrigated                                               |
| 23 | FRST | Forest; Montane mixed; Open (20-50% crown cover)                         |
| 24 | RNGB | Afro-alpine; Erica / Hypericum                                           |
| 25 | RNGE | Afro-alpine; Grassland / Moorland                                        |
| 26 | WETN | Wetland; Perennial Swamp / Marsh                                         |
| 27 | FRSD | Forest; Montane broadleaf; Open (20-50% crown cover)                     |
| 28 | FRSE | Forest; Bamboo; Highland Bamboo; Dense (50-80% crown cover)              |
| 29 | FRSE | Forest; Riparian; Dense (50-80% crown cover)                             |
| 30 | FRSE | Forest; Bamboo; Highland Bamboo; Open (20-50% crown cover)               |
| 32 | FRSE | Forest; Montane coniferous; Dense (50-80% crown cover)                   |
| 33 | ORCD | Forest; Plantation Forest; Closed (>80% crown cover)                     |
| 34 | FRST | Forest; Montane mixed; Closed (>80% crown cover)                         |
| 35 | FRSD | Forest; Montane broadleaf; Dense (50-80% crown cover)                    |
| 37 | AGRR | Cultivated Land; Perennial crops; Enset/Root LC System; lightly stocked  |
| 38 | FRSE | Forest; Lowland semi-evergreen; Closed (>80% crown cover)                |
| 39 | FRSE | Forest; Lowland semi-evergreen; Dense (50-80% crown cover)               |
| 40 | FRSE | Forest; Lowland semi-evergreen; Open (20-50% crown cover)                |
| 42 | FRSD | Forest; Montane broadleaf; Closed (>80% crown cover)                     |
| 43 | FRST | Forest; Montane mixed; Dense (50-80% crown cover)                        |

---
